# Supplementary material
Source: publisher site journal article supplement (https://www.spandidos-publications.com/4875/downloadSupplementary)
Supplement: Supplementary file 1 [file downloadSupplementary]

Figure S1. List of the 128 blood coagulation-related genes tested in the proband.

|                 |                 |                 |                 |               |               |                |                 |
|-----------------|-----------------|-----------------|-----------------|---------------|---------------|----------------|-----------------|
| <i>ABCG5</i>    | <i>ABCG8</i>    | <i>ACTN1</i>    | <i>ADAMTS13</i> | <i>AKR1D1</i> | <i>ALG2</i>   | <i>ALG6</i>    | <i>AMACR</i>    |
| <i>ANKRD26</i>  | <i>ANO6</i>     | <i>AP3B1</i>    | <i>B4GALT1</i>  | <i>BCL2L1</i> | <i>BCS1L</i>  | <i>BLOC1S3</i> | <i>BLOC1S6</i>  |
| <i>BRAF</i>     | <i>CALR</i>     | <i>CBL</i>      | <i>CTNNA1</i>   | <i>CYC1</i>   | <i>CYCS</i>   | <i>CYP7B1</i>  | <i>DPM1</i>     |
| <i>DTNBP1</i>   | <i>ETV6</i>     | <i>F10</i>      | <i>F11</i>      | <i>F12</i>    | <i>F13A1</i>  | <i>F13B</i>    | <i>F2</i>       |
| <i>F2R</i>      | <i>F5</i>       | <i>F7</i>       | <i>F8</i>       | <i>F9</i>     | <i>FBLN1</i>  | <i>FGA</i>     | <i>FGB</i>      |
| <i>FGG</i>      | <i>FLII</i>     | <i>FLNA</i>     | <i>GATA1</i>    | <i>GF11B</i>  | <i>GGCX</i>   | <i>GP1BA</i>   | <i>GP1BB</i>    |
| <i>GP9</i>      | <i>HOXA11</i>   | <i>HPS1</i>     | <i>HPS3</i>     | <i>HPS4</i>   | <i>HPS5</i>   | <i>HPS6</i>    | <i>HRG</i>      |
| <i>HSD3B7</i>   | <i>ITGA2</i>    | <i>ITGA2B</i>   | <i>ITGB3</i>    | <i>ITPA</i>   | <i>JAK2</i>   | <i>KAT6B</i>   | <i>KIRREL3</i>  |
| <i>KLKB1</i>    | <i>KNR1</i>     | <i>KRAS</i>     | <i>LARS</i>     | <i>LMAN1</i>  | <i>LYRM7</i>  | <i>LZTR1</i>   | <i>MASTL</i>    |
| <i>MCFD2</i>    | <i>MECOM</i>    | <i>MGAT2</i>    | <i>MPI</i>      | <i>MPL</i>    | <i>MYH9</i>   | <i>NBEAL2</i>  | <i>NF1</i>      |
| <i>NRAS</i>     | <i>P2RX1</i>    | <i>P2RY12</i>   | <i>PLAT</i>     | <i>PMM2</i>   | <i>PRF1</i>   | <i>PROC</i>    | <i>PROS1</i>    |
| <i>PTPN11</i>   | <i>RAF1</i>     | <i>RASGRP2</i>  | <i>RBM8A</i>    | <i>RFT1</i>   | <i>RIT1</i>   | <i>RUNX1</i>   | <i>SERPINC1</i> |
| <i>SERPIND1</i> | <i>SERPINE1</i> | <i>SERPINE2</i> | <i>SERPINF2</i> | <i>SH2B3</i>  | <i>SHOC2</i>  | <i>SOS1</i>    | <i>SOS2</i>     |
| <i>SRC</i>      | <i>SRD5A3</i>   | <i>STIM1</i>    | <i>STX11</i>    | <i>STXBP2</i> | <i>TBXA2R</i> | <i>TBXAS1</i>  | <i>TECTA</i>    |
| <i>THBD</i>     | <i>THPO</i>     | <i>TRMU</i>     | <i>TTC19</i>    | <i>TUBB1</i>  | <i>UNC13D</i> | <i>UQCCL2</i>  | <i>UQCCL3</i>   |
| <i>UQCRB</i>    | <i>UQCRC2</i>   | <i>UQCRQ</i>    | <i>VKORC1</i>   | <i>VWF</i>    | <i>WAS</i>    | <i>WIPF1</i>   | <i>ZFPM1</i>    |
